# Supplementary material for: Gene flow, ancient polymorphism, and ecological adaptation shape the genomic landscape of divergence among Darwin's finches
Source: HighWire-hosted journal article supplement (doi:10.1101/gr.212522.116), 2017-04-25
Supplement: Supplemental_Fig_S2.pdf [file Supplemental_Fig_S2.pdf]

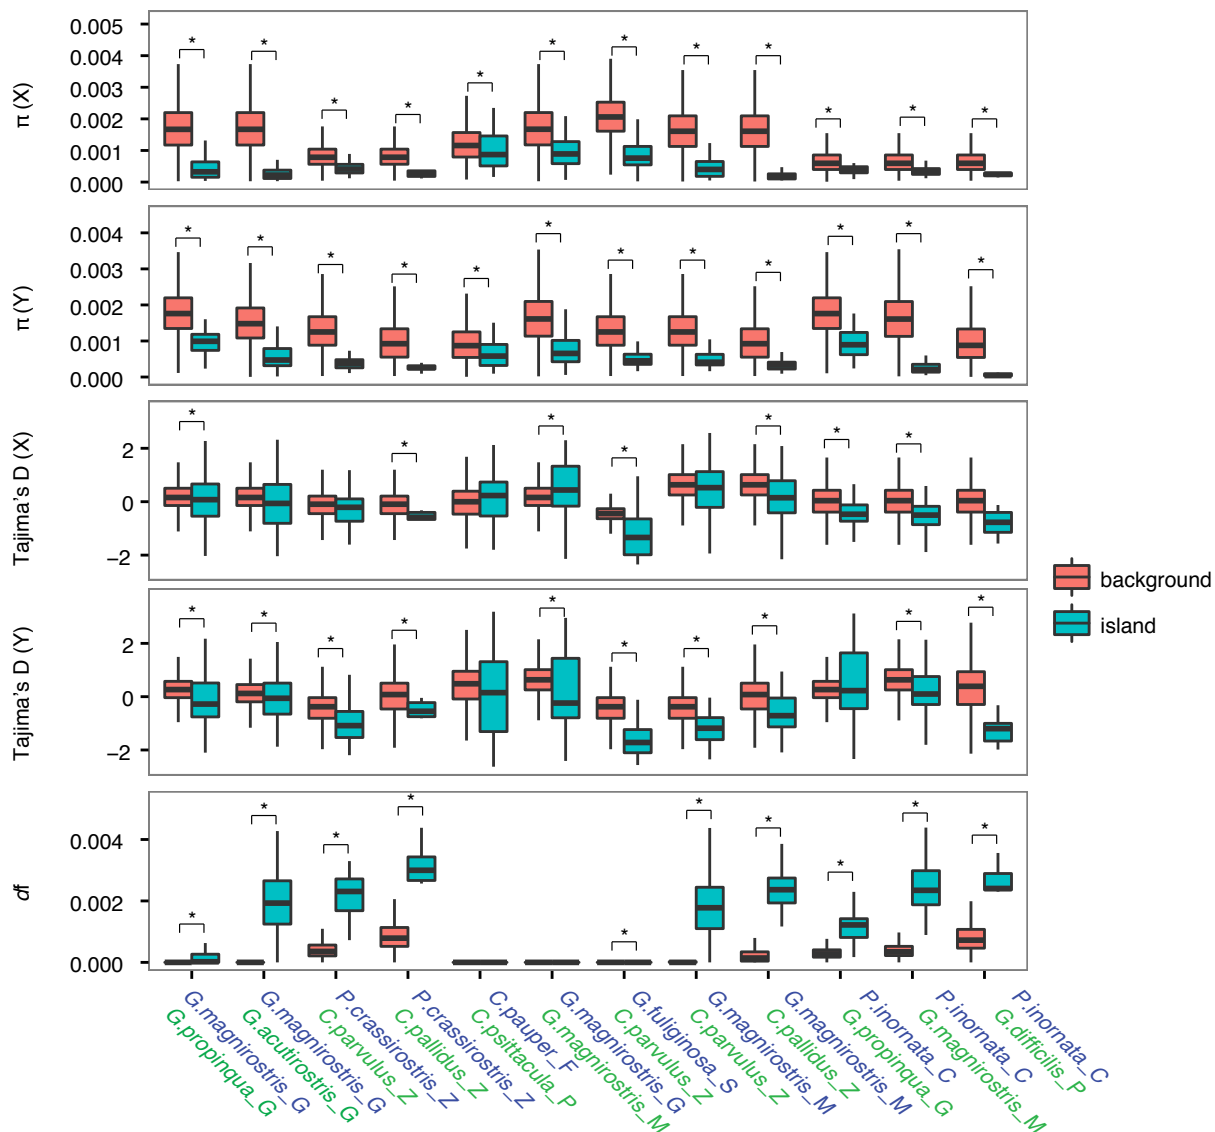

**Figure S2.** Estimates of genomic parameters among pairs of Darwin's finch species. The two species in each pair are denoted X (species name in blue) and Y (species name in green). Five panels from top to bottom represent nucleotide diversity in species X and Y, Tajima's  $D$  in species X and Y, fixed differences between species X and Y. Significance is tested with Wilcoxon rank sum test. \*,  $P < 0.05$ .
