# Supplementary material for: Gene flow, ancient polymorphism, and ecological adaptation shape the genomic landscape of divergence among Darwin's finches
Source: HighWire-hosted journal article supplement (doi:10.1101/gr.212522.116), 2017-04-25
Supplement: Supplemental_Table_S1.pdf [file Supplemental_Table_S1.pdf]

**Table S1. Number of shared islands between paired comparisons.**

| Class of shared islands <sup>a</sup>                | Species pairs                                       | <i>ALX1</i> haplogroup | <i>HMGA2</i> haplogroup | No. of shared windows | Annotation                                                         | <i>P</i> value <sup>b</sup> |
|-----------------------------------------------------|-----------------------------------------------------|------------------------|-------------------------|-----------------------|--------------------------------------------------------------------|-----------------------------|
| (A) Between ground-ground and tree-tree finch pairs | <i>G.magnirostris_G</i> vs. <i>G.propinqua_G</i>    | different              | same                    | 0                     |                                                                    | 1.000                       |
|                                                     | <i>C.pauper_F</i> vs. <i>C.psittacula_P</i>         | same                   | different               |                       |                                                                    |                             |
|                                                     | <i>G.magnirostris_G</i> vs. <i>G.acutirostris_G</i> | different              | different               | 8                     | 7 windows located in <i>HMGA2</i> locus                            | 0.001                       |
|                                                     | <i>C.pauper_F</i> vs. <i>C.psittacula_P</i>         | same                   | different               |                       |                                                                    |                             |
|                                                     | <i>G.magnirostris_G</i> vs. <i>G.magnirostris_M</i> | same                   | same                    | 3                     |                                                                    | 0.009                       |
|                                                     | <i>C.pauper_F</i> vs. <i>C.psittacula_P</i>         | same                   | different               |                       |                                                                    |                             |
| (B) Between ground-tree and ground-tree finch pairs | <i>G.fuliginosa_S</i> vs. <i>C.parvulus_Z</i>       | same                   | same                    | 17                    |                                                                    | 0                           |
|                                                     | <i>G.magnirostris_M</i> vs. <i>C.parvulus_Z</i>     | different              | different               |                       |                                                                    |                             |
|                                                     | <i>G.fuliginosa_S</i> vs. <i>C.parvulus_Z</i>       | same                   | same                    | 2                     |                                                                    | 0.031                       |
|                                                     | <i>G.magnirostris_M</i> vs. <i>C.pallidus_Z</i>     | different              | same                    |                       |                                                                    |                             |
| (C) Between more distantly related pairs            | <i>P.crassirostris_Z</i> vs. <i>C.parvulus_Z</i>    | same                   | different               | 6                     | 3 windows located in <i>HMGA2</i> locus                            | 0                           |
|                                                     | <i>P.inornata_C</i> vs. <i>G.magnirostris_M</i>     | different              | different               |                       |                                                                    |                             |
|                                                     | <i>G.magnirostris_G</i> vs. <i>G.propinqua_G</i>    | different              | same                    | 9                     | 2 windows located in <i>HMGA2</i> locus and 3 in <i>ALX1</i> locus | 0                           |
|                                                     | <i>P.inornata_C</i> vs. <i>G.magnirostris_M</i>     | different              | different               |                       |                                                                    |                             |

<sup>a</sup> Class A and B identified the shared islands between ground- and tree- finch pairs. Pairwise comparisons in class A represent species pairs from independent branches in phylogeny while class B and C involve shared lineages.

<sup>b</sup> Significance is estimated with randomization test.
